## Use it or lose it? Sablefish, *Anoplopoma fimbria*, a species representing a fifth teleostean group where the $\beta$ NHE associated with the red blood cell adrenergic stress response has been secondarily lost

Jodie L. Rummer<sup>1,\*†</sup>, Mani Roshan-Moniri<sup>1,†</sup>, Shannon K. Balfry<sup>2</sup> and Colin J. Brauner<sup>1</sup>

<sup>1</sup>Department of Zoology, University of British Columbia, No. 2370–6270 University Boulevard, Vancouver, BC, Canada, V6T 1Z4 and <sup>2</sup>Faculty of Land and Food Systems, University of British Columbia, Vancouver, BC, Canada, V6T 1Z4

\*Author for correspondence (rummer@zoology.ubc.ca)

<sup>†</sup>These authors contributed equally to this work

Accepted 19 January 2010

### SUMMARY

Like most teleosts, sablefish (*Anoplopoma fimbria* Pallas 1814) blood exhibits a moderate Root effect (~35% maximal desaturation), where a reduction in blood pH dramatically reduces O<sub>2</sub> carrying capacity, a mechanism important for oxygenating the eye and filling the swim bladder (SB) in teleosts. Although sablefish lack a SB, we observed a well-defined choroid rete at the eye. The adrenergically mediated cell swelling typically associated with a functional red blood cell (RBC)  $\beta$ -adrenergic Na<sup>+</sup>/H<sup>+</sup> exchanger ( $\beta$ NHE), which would normally protect RBC pH, and thus O<sub>2</sub> transport, during a generalized acidosis, was not observed in sablefish blood. Neither isoproterenol (a  $\beta$ -agonist) nor 8-bromo cAMP could elicit this response. Furthermore, RBC osmotic shrinkage, known to stimulate NHEs in general and  $\beta$ NHE in other teleosts such as trout and flounder, resulted in no significant regulatory volume increase (RVI), further supporting the absence of a functional RBC  $\beta$ NHE. The onset of the Root effect occurs at a much lower RBC pH (6.83–6.92) than in other teleosts, and thus RBC  $\beta$ NHE may not be required to protect O<sub>2</sub> transport during a generalized acidosis *in vivo*. Phylogenetically, sablefish may represent a fifth group of teleosts exhibiting a secondary reduction or loss of  $\beta$ NHE activity. However, sablefish have not lost the choroid rete at the eye (unlike in the other four groups), which may still function with the Root effect to oxygenate the retina, but the low pH onset of the Root effect may ensure haemoglobin (Hb)-O<sub>2</sub> binding is not compromised at the respiratory surface during a general acidosis in the absence of RBC  $\beta$ NHE. The sablefish may represent an anomaly within the framework of Root effect evolution, in that they possess a moderate Root effect and a choroid rete at the eye, but lack the RBC  $\beta$ NHE and the SB system.

Key words:  $\beta$ NHE, catecholamine, Root effect, regulatory volume increase, amiloride, hyperosmotic stress.

### INTRODUCTION

The Root effect, a phenomenon limited almost exclusively to teleost fishes, is defined as the decrease in O<sub>2</sub> carrying capacity of the blood due to a decrease in pH (Brittain, 1987; Ingermann, 1982; Pelster and Weber, 1991; Root, 1931; Root and Irving, 1943). This mechanism at the level of the haemoglobin (Hb) evolved 400 million years ago (mya) (Berenbrink et al., 2005) and is used in many living ray-finned fishes to deliver O<sub>2</sub> to the retina, a recognized avascular yet metabolically active tissue (Wittenberg and Wittenberg, 1974), and the swim bladder (SB), a specialized gas-filled structure within the body cavity used to maintain buoyancy, against extremely high partial pressure gradients (>50 atm, ~5050 kPa) associated with the deep sea (Alexander, 1966). A recent evolutionary reconstruction suggests, however, that the Root effect evolved long before (~150 million years) the single evolutionary appearance of the counter-current capillary network of the eye, the choroid rete, which permits exploitation of the Root effect at the eye, and 270 million years before the multiple appearances of the counter-current capillary network of the SB (Berenbrink et al., 2005). Berenbrink and colleagues convey that the choroid rete is the most ancient anatomical structure known that is associated with the Root effect. They demonstrated that if a choroid rete is present, loss of the SB rete mirabile or the SB altogether is not associated with a change in the magnitude of the Root effect; therefore it is not surprising to observe species

possessing a moderate Root effect that is utilized for O<sub>2</sub> delivery to the eye but not the SB.

Nevertheless, negative side effects can be associated with the Root effect. When a fish experiences a generalized acidosis, which can occur during exposure to environmental hypoxia or hypercarbia or following exhaustive exercise, the presence of a Root effect could result in incomplete blood-O<sub>2</sub> saturation at the gills, compromising O<sub>2</sub> uptake (Milligan and Wood, 1987; Salama and Nikinmaa, 1988; Tufts and Randall, 1989). Approximately 150 mya, in teleosts more derived than Osteoglossomorpha, subsequent to the evolution of the choroid rete but prior to the appearance of the SB rete mirabile, a  $\beta$ -adrenergically stimulated sodium (Na<sup>+</sup>) proton (H<sup>+</sup>) exchanger ( $\beta$ NHE) on the surface of the red blood cell (RBC) membrane evolved (Berenbrink et al., 2005). Following development of a blood acidosis, adrenaline and noradrenaline are released, activating the RBC  $\beta$ NHE which extrudes protons to protect RBC intracellular pH (pH<sub>i</sub>), Hb-O<sub>2</sub> affinity, O<sub>2</sub> uptake at the gill, and therefore O<sub>2</sub> supply to the tissues (Borgese et al., 1987; Cossins and Kilbey, 1991; Nikinmaa et al., 1984; Primmitt et al., 1986; Salama and Nikinmaa, 1988) (reviewed by Berenbrink and Bridges, 1994; Fievet and Motais, 1991; Jensen, 2004; Thomas and Perry, 1992). During this cascade of events, not only is pH<sub>i</sub> protected, sometimes elevated, but also H<sup>+</sup> extrusion and Na<sup>+</sup> influx initiate a further chain of events requiring anion exchange to remove HCO<sub>3</sub><sup>-</sup> from the RBC in exchange for Cl<sup>-</sup>, Na<sup>+</sup>/K<sup>+</sup>-ATPase activation, as well as influx of

osmotically obliged water, resulting in a RBC regulatory volume increase (RVI) and associated increase in haematocrit (Hct) (Borgese et al., 1987; Cossins and Gibson, 1997; Cossins and Kilbey, 1991; Guizouarn et al., 1993; Nikinmaa et al., 1990). Species possessing a RBC  $\beta$ NHE generally possess a pronounced Root effect, and therefore extremely pH-sensitive Hbs (Berenbrink et al., 2005); however, the  $\beta$ NHE has been secondarily lost in four groups of derived teleosts (Berenbrink et al., 2005), a loss that is also associated with a substantial decrease in the magnitude of the Root effect.

Sablefish (*Anoplopoma fimbria* Pallas 1814) are a species that already represent a small industry in aquaculture, yet little is known regarding blood- $O_2$  transport characteristics. Information about the physiology of sablefish is limited to what has been investigated to assess post-release survival in the increasingly popular fisheries industry and the efficacy of protocols for rearing this new species in aquaculture (Davis, 2002; Davis, 2005; Davis and Parker, 2004; Lupes et al., 2006). Sablefish do not exhibit high release mortality rates prevalent in other deep-water teleosts, largely due to the absence of a SB (Davis, 2002; Davis, 2005; Davis and Parker, 2004; Furnell, 1987; Lupes et al., 2006). Sablefish are also thought to be relatively resistant to stress, are notably tolerant to hypoxia and air exposure (Davis and Parker, 2004; Moser et al., 1994), and are known to colonize the unforgiving oxygen minimum zone (OMZ) off the California coast (Moser et al., 1994), implying that their  $O_2$  transport system may be resilient to stress and other environmental challenges. The present study was conducted to characterize the blood- $O_2$  transport system of sablefish, with the specific aim to (i) characterize the magnitude and pH onset of the Root effect to examine the potential effect of a generalized acidosis on  $O_2$  transport, and (ii) determine whether the red blood cells of sablefish exhibit a functional  $\beta$ NHE, or an NHE that can be stimulated through changes in RBC volume (RVI response). Data collected for sablefish were compared with data on rainbow trout (*Oncorhynchus mykiss*), the species for which we currently have the most comprehensive understanding of  $O_2$  delivery mechanisms, as well as copper rockfish (*Sebastes caurinus*), a species from the same taxonomic order and similar, albeit shallower, habitat to that of the sablefish.

## MATERIALS AND METHODS

### Experimental animals and sampling

Juvenile sablefish (size range, 60–150 g wet mass) were purchased from Cluxewe Enterprises (Cedar, BC, Canada) and transported to the Department of Fisheries and Oceans/University of British Columbia (UBC), Centre for Aquaculture and Environmental Research (West Vancouver, BC, Canada). Upon arrival, fish were separated into three 1100 l fibreglass tanks and fed a commercial Atlantic salmon feed (Ewos Canada Ltd, Surrey, BC, Canada; 2 mm pellets) at 2% body mass per day. Fish were maintained on a natural photoperiod (daylight fluorescent lights) and were provided with running (11–15 l min<sup>-1</sup>), filtered and oxygenated seawater. Temperature, dissolved oxygen and salinity of the sea water were measured daily at 12:00 h and these parameters ranged from 7.7 to 12°C, 7.5 to 10.4 mg l<sup>-1</sup> and 28 to 31‰, respectively, over the duration that fish were held. Fish were maintained in the facility for approximately 2 years until this project commenced, at which point fish weighed between 900 and 1800 g (wet mass).

Rainbow trout, *O. mykiss* (size range, 300–600 g wet mass), were obtained from Spring Valley Trout Farm (Langley, BC, Canada). Fish were maintained in the Department of Zoology, UBC, in 4000 l flow-through tanks supplied with Vancouver dechlorinated

municipal tap water (average 12°C) under a natural photoperiod. Fish were fed every other day to satiation using commercial trout pellets (Skretting, Orient 4-0; Vancouver, BC, Canada). All protocols comply with the guidelines approved by the Canadian Council on Animal Care, protocol no. A07-0080.

Copper rockfish, *S. caurinus* (size range, 159–905 g wet mass), were collected *via* hook and line from shallow water (<4 m depth) off the coast of Bamfield Marine Sciences Centre (BMSC, BC, Canada). Fish were transported back to the BMSC laboratory in buckets filled with aerated seawater and were maintained in aquaria equipped with flow-through seawater for at least 48 h until experiments commenced.

At the beginning of each set of experiments, fish were anaesthetized in a benzocaine solution ( $2 \times 10^{-4}$  mol l<sup>-1</sup> *p*-aminobenzoate), and blood was drawn from the caudal vein and collected in heparinized syringes. RBCs were prepared as described elsewhere (Caldwell et al., 2006). Briefly, RBCs were rinsed twice with and resuspended in ice-cold Cortland's saline (Wolf, 1963), Hct was standardized to 25%, and the samples were stored at 4°C overnight. In preliminary investigations using rinsed and resuspended rainbow trout RBCs stored overnight (see Caldwell et al., 2006), we determined we could generate oxygen equilibrium curves (OECs) that were not significantly different from those generated using blood freshly drawn from resting, cannulated fish. Furthermore, the rinse and resuspend procedure had no significant effect on the RBC  $\beta$ NHE response to isoproterenol in rainbow trout RBCs stored for up to 96 h (Caldwell et al., 2006). Following blood collection, five sablefish were killed with an overdose of benzocaine solution (*p*-aminobenzoate), so that the eyes could be dissected and observations made for the presence or absence of the choroid rete (for details, see Berenbrink et al., 2005).

### Series 1: oxygen equilibrium curves and quantification of the Root effect

A 3 ml aliquot of washed and resuspended sablefish or copper rockfish RBCs that had been adjusted to 25% Hct was placed into one of four individual Eschweiler tonometers thermostatically regulated to 12°C (the temperature at which both species were acclimated at the time of sampling). Resuspended RBCs were equilibrated for 45 min with 0.5, 1, 2 or 4%  $CO_2$  (0.5, 1, 2, 3 or 5%  $CO_2$  for copper rockfish) balanced with air (21%  $O_2$ ;  $N=4$  per  $CO_2$  tension). Samples were then exposed to stepwise decreases in  $O_2$  tension (approximately 21, 15, 12.5, 8.5, 4.5 and 0%) by decreasing air while proportionally increasing  $N_2$ , as regulated by a gas-mixing pump (DIGAMIX 275 6KM 422 Wösthoff, Bochum, Germany) (trout and sablefish blood throughout the entire experiment) or Smart-Trak mass flow meters (Series 100; Sierra Instruments, Inc., Monterey, CA, USA) (copper rockfish samples only). Blood samples (0.8 ml) were drawn from each tonometer at each incubation interval (20 min at each  $O_2$  tension) into pre-gassed Eppendorf<sup>TM</sup> tubes or a pre-gassed Hamilton<sup>TM</sup> syringe to measure  $O_2$  content, Hct, [Hb], pH<sub>i</sub> and extracellular pH (pH<sub>e</sub>), each parameter being measured in duplicate for each blood sample. Total  $O_2$  content was measured according to previous methods (Tucker, 1967). A separate 10  $\mu$ l aliquot of blood was added to Drabkin's solution (Sigma-Aldrich cat. no. D5941; St Louis, MO, USA) and the absorbance measured spectrophotometrically at 540 nm; [Hb] (mmol l<sup>-1</sup> per tetramer) was calculated applying a millimolar extinction coefficient of 11 mmol l<sup>-1</sup> cm<sup>-1</sup>. Hb saturation (expressed as a percentage) was calculated by converting the values obtained for  $O_2$  content to reflect millimoles of  $O_2$  per litre of blood, dividing by 4, and dividing by the tetrameric Hb concentration obtained spectrophotometrically.

Hct was determined in duplicate as the ratio of packed RBCs to total blood volume, from blood-filled microcapillary tubes centrifuged at 3000 r.p.m. for 5 min. Mean corpuscular Hb concentration (MCHC) was calculated as  $\text{Hb}/(\text{Hct}/100)$ . Whole blood was analysed to determine  $\text{pH}_e$ , and the freeze-thaw method (see Zeidler and Kim, 1977) was used to prepare isolated RBCs to determine  $\text{pH}_i$ ; both pH measurements were conducted for each sample in duplicate using a BMS 3 Mk2 Blood Microsystem (Radiometer, Copenhagen, Denmark).

### Series 2: RBC $\beta$ NHE, activation and response characterization

To assess the RBC  $\beta$ NHE response, a 2 ml aliquot of washed and resuspended sablefish or trout RBCs that had been adjusted to 25% Hct was placed into one of four individual Eschweiler tonometers thermostatically regulated to 12°C. Resuspended RBCs were equilibrated for 45 min under acidic and hypoxic conditions generated by gas mixtures consisting of 0.5%  $\text{CO}_2$  and 50% air, 2%  $\text{CO}_2$  and 15% air, or 2%  $\text{CO}_2$  and 0% air, balanced with  $\text{N}_2$  to potentiate the  $\beta$ NHE response. Isoproterenol (ISO; Sigma-Aldrich cat. no. 286303), a  $\beta$ -adrenergic analogue of noradrenaline, was added to each tonometer to achieve a final concentration of  $10^{-5} \text{ mol l}^{-1}$  (Caldwell et al., 2006). In another experiment performed to bypass the  $\beta$ -adrenergic receptor to activate the  $\beta$ NHE directly, the membrane-permeable 8-bromo cyclic AMP (cAMP; Sigma-Aldrich cat. no. 372447) was added to each tonometer to achieve a final nominal concentration of  $10^{-2} \text{ mol l}^{-1}$  (Mahe et al., 1985; Perry et al., 1996; Thomas and Gilmour, 2006). Additional RBC samples were injected with propranolol (PROP; Sigma-Aldrich cat. no. P0884), a  $\beta$ -adrenergic antagonist, to achieve a final concentration of  $2 \times 10^{-5} \text{ mol l}^{-1}$  (Fuchs and Albers, 1988; Motais et al., 1989). A final group was injected with Cortland's saline only to control for volume disturbance. Prior to injection of ISO, cAMP, PROP, the ISO+PROP combination or saline, samples were drawn from each tonometer and analysed to establish baseline [Hb], Hct, MCHC,  $\text{pH}_i$  and  $\text{pH}_e$  values. Following initiation of the treatment, samples were drawn at 5, 30, 60 and 90 min and analysed in the same manner as above. Sampling and treatments were performed in random order ( $N=6$  for each treatment).

### Series 3: characterization of the RBC RVI response

The magnitude of the RBC RVI was investigated in rinsed and resuspended sablefish RBCs upon incubation in tonometers exactly as described in series 2, except RBCs were incubated in gas mixtures consisting of 0.5%  $\text{CO}_2$  and 50% air or 0.5%  $\text{CO}_2$  and 0% air, balanced with  $\text{N}_2$ . Hyperosmotic shrinkage was induced by introducing a modified ( $10\times$  concentrated, hypersaline) Cortland's saline solution ( $\sim 3000 \text{ mosmol l}^{-1}$ ) into each tonometer to increase the final osmolarity by approximately 50%, a concentration cited to yield at least 25% cell shrinkage (Brauner et al., 2002; Koldkjær et al., 2002; Kristensen et al., 2007; Kristensen et al., 2008). Cell shrinkage was initiated in the absence and presence of EIPA [5-(*N*-ethyl-*N*-isopropyl)amiloride; Sigma-Aldrich cat. no. A3085], a general NHE inhibitor (Kristensen et al., 2007), which was used to block the NHE-related RVI response. Cortland's saline, hypersaline, EIPA (final concentration of  $10^{-4} \text{ mol l}^{-1}$ ) and hypersaline+EIPA were injected as four separate treatments into individual tonometers (Kristensen et al., 2007). Baseline samples were drawn and analysed from each tonometer prior to treatment. Post-treatment samples were drawn and analysed after 5, 30, 60 and 90 min. All parameters mentioned in the previous two experiments were also measured for this RVI experiment ( $N=6$ ).

### Calculations and statistical analyses

Mean  $\pm$  s.e.m. per cent Hb saturation ( $S$ ) values were plotted as a function of incubation  $P_{\text{O}_2}$  (mmHg) for each  $\text{CO}_2$  (0.5, 1, 2 and 4%) incubation treatment for sablefish blood, and OECs were fitted to data using the Dynamic Fit Wizard function in SigmaPlot for Windows 10.0.1.25 (Systat Software Inc. 2006). Half-saturation  $\text{O}_2$  tensions ( $P_{50}$ ) and the Hill cooperativity coefficients ( $n_{\text{H}}$ ) were interpolated from  $\log[S/(1-S)]$  vs  $\log P_{\text{O}_2}$  plots (20–80% saturation), where  $S$  is the fractional Hb saturation with  $\text{O}_2$  (Hb- $\text{O}_2$  saturation). Bohr coefficients ( $\Phi$ ) were calculated as  $\Delta \log P_{50} / \Delta \text{pH}_e$  for pH values corresponding to  $\text{CO}_2$  incubation tensions. Partial pressures are given in mmHg. For unit conversion, 1 mmHg = 0.1333 kPa. Curves were fitted for each data set for sablefish and copper rockfish to determine the total magnitude and the pH onset of the Root effect. Statistical differences between Hb- $\text{O}_2$  saturation values for each  $\text{CO}_2$  treatment were determined by ANOVA and *post-hoc* Holm-Sidak multiple comparisons procedures using SigmaStat for Windows 3.5.0.54 (Systat Software, Inc. 2006). Changes in Hct for NHE and RVI experiments were assessed for significance following an ANOVA and compared between all treatment groups, at all sampling intervals, and between sablefish and trout. All *post-hoc* comparisons in both NHE and RVI experiments (Dunnett's method) were made in comparison to the initial mean baseline Hct value. Additionally, for the RVI experiments, data were plotted as relative change in Hct (%) as a function of treatment and time. All statistical tests were performed with  $\alpha=0.05$ .

## RESULTS

### Choroid rete observations

Sablefish were found to possess a pronounced, dense network of capillaries clustered around the optic nerve and adjacent to the retina of the eye (Fig. 1), which has not previously been documented.

### Series 1: oxygen equilibrium curves and quantification of the Root effect

Incubating washed and resuspended sablefish RBCs at progressively higher  $\text{CO}_2$  tensions (from 0.5 to 1, 2 and 4%) resulted in a statistically significant reduction in  $\text{pH}_e$  at each  $\text{CO}_2$  tension (Table 1) and both a rightward (Bohr effect) and a downward (Root effect) shift in the OEC (Fig. 2). Mean Hb- $\text{O}_2$  saturation at each incubation  $P_{\text{O}_2}$  was significantly lower at each increasing  $\text{CO}_2$  tension, with the exception of 0.5% and 1%  $\text{CO}_2$  at 60 mmHg, and 2% and 4%  $\text{CO}_2$  at air saturation (160 mmHg). At air-saturated oxygen tensions, the Root effect resulted in a reduction in Hb- $\text{O}_2$  saturation from 96% at 0.5%  $\text{CO}_2$ , to 84% at 1%  $\text{CO}_2$ , 68% at 2%  $\text{CO}_2$  and 65% at 4%  $\text{CO}_2$ . The  $P_{50}$  values calculated for samples incubated at 0.5% and 1%  $\text{CO}_2$  (29.3 and 30.7 mmHg) were not significantly different, but were significantly lower than the  $P_{50}$  calculated for 2% and 4%  $\text{CO}_2$  incubation conditions (51.8 and 78.1 mmHg). The resulting Bohr coefficients were 0.06 (based upon the change in  $P_{50}$  between 0.5% and 1%  $\text{CO}_2$  treatments), 1.32 (for 1% and 2%  $\text{CO}_2$  treatments) and 0.91 (for 2% and 4%  $\text{CO}_2$  treatments) (Table 1), the last two values being significantly different from the first. Low co-operativity in Hb- $\text{O}_2$  binding was exhibited, as demonstrated by Hill coefficients ( $n_{\text{H}}$ ) of 1.40, 1.17, 0.97 and 1.09 for each OEC curve (0.5, 1, 2 and 4%  $\text{CO}_2$ , respectively), all of which were significantly different ( $P < 0.001$ , except between 1% and 4%, and 2% and 4%  $\text{CO}_2$  where  $P < 0.05$ ; Table 1). The relationship between  $\text{pH}_e$  and  $\text{pH}_i$  is depicted in Fig. 3, where changes in  $\text{pH}_i$  were significantly correlated with changes in  $\text{pH}_e$  (Fig. 3). Both [Hb] and Hct remained constant throughout all  $\text{CO}_2$  treatments and did not significantly deviate over

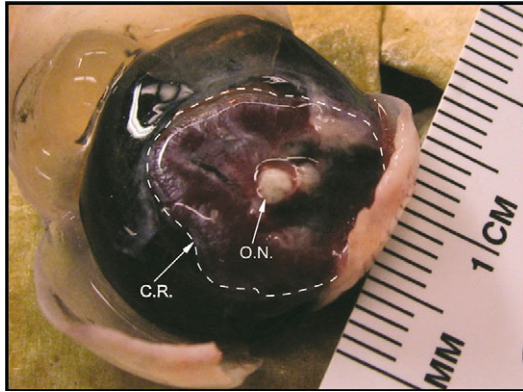

Fig. 1. Representative photograph depicting the choroid rete (C.R.) and optic nerve (O.N.) observed upon dissecting each sablefish eye. The choroid rete is outlined for clarity (white dashed line).

the course of any treatment or between treatments ( $P < 0.001$ ; data not shown).

Washed and resuspended copper rockfish RBCs incubated under high CO<sub>2</sub> tensions (from 0.5% to 1, 2, 3 and 5%) showed a decrease in pH<sub>e</sub> and pH<sub>i</sub> as expected, which markedly right-shifted and down-shifted OECs (data not shown). The pH<sub>e</sub> at atmospheric O<sub>2</sub> tension (~160 mmHg) for blood incubated at 0.5% CO<sub>2</sub> (7.91±0.07) was not significantly different from the pH<sub>e</sub> upon incubation at 1% CO<sub>2</sub> (7.98±0.09) ( $P = 0.49$ ; data not shown). However, pH<sub>e</sub> fell significantly to 7.62±0.06, 7.40±0.02 and 7.16±0.08 upon incubation at 2, 3 and 5% CO<sub>2</sub> (data not shown). pH<sub>i</sub> fell dramatically from 7.29±0.11 at 0.5% CO<sub>2</sub> to 7.19±0.08, 7.00±0.06, 6.92±0.05 and 6.83±0.05, at 1, 2, 3 and 5% CO<sub>2</sub>, respectively. Maximal Hb-O<sub>2</sub> saturation under these incubation conditions was 91.43±3.79%, 90.18±3.22%, 56.28±3.19%, 44.45±0.77% and 38.14±0.91%, all of which were plotted against pH<sub>i</sub> to represent Root effect magnitude and pH onset (Fig. 4). Hct was 22.95±0.81% after the first incubation series (0.5% CO<sub>2</sub>) and 25.27±1.42% after the final incubation series (5% CO<sub>2</sub>), with a slight but significant difference detected between the two groups ( $P = 0.025$ ; data not shown).

**Series 2: RBC βNHE, activation and response characterization**

Compared with rainbow trout, sablefish RBCs did not significantly swell, as observed by the lack of change in Hct after blood samples were incubated under mildly hypoxic conditions (50% air, 0.5%

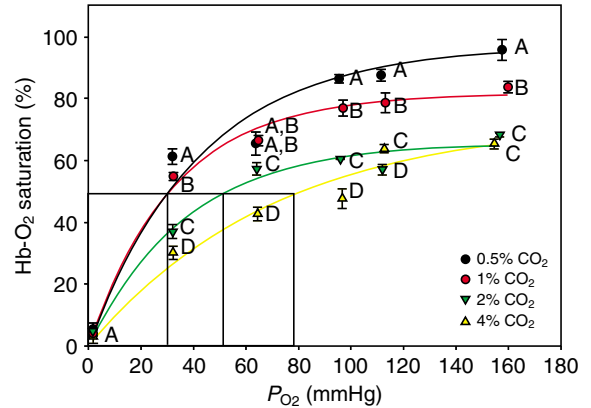

Fig. 2. Oxygen equilibrium curves (OECs) for sablefish red blood cells (RBCs), rinsed and resuspended (haematocrit, Hct 25%), and incubated at 0.5, 1, 2 and 4% CO<sub>2</sub> tensions with stepwise decreases in P<sub>O<sub>2</sub></sub> (mmHg) from 21% (160 mmHg) to 0% (0 mmHg). Data are means ± s.e.m. Different letters indicate statistically significant differences between CO<sub>2</sub> treatments within a given O<sub>2</sub> incubation condition. Thin black lines extend from 50% Hb-O<sub>2</sub> saturation to indicate the half-saturation O<sub>2</sub> tension (P<sub>50</sub>) for each CO<sub>2</sub> treatment.

CO<sub>2</sub>, balance N<sub>2</sub>) and stimulated with isoproterenol (ISO;  $P = 0.422$ ) (Fig. 5A). Trout RBCs swelled by at least 36% under mildly hypoxic conditions upon ISO exposure ( $P < 0.001$ ) (Fig. 5A). The trend of no RBC swelling persisted when sablefish blood samples were exposed to ISO following incubation under severely hypoxic and hypercapnic conditions (15% air, 2% CO<sub>2</sub>, balance N<sub>2</sub>;  $P = 0.234$ ) as well as under anoxic hypercapnic conditions (0% air, 2% CO<sub>2</sub>, balance N<sub>2</sub>;  $P = 0.240$ ) (Fig. 5A), both of which potentiate the response in other species. Exposing trout RBCs to a cAMP analogue resulted in significant swelling (up to 25%,  $P < 0.001$ ), but no swelling could be detected in sablefish RBCs under mild hypoxia ( $P = 0.731$ ) or severe hypoxia and hypercapnia ( $P = 0.253$ ) (Fig. 5B). However, under anoxic and hypercapnic incubation conditions, Hct was significantly elevated (by 14%), but only at the final sampling time (90 min;  $P < 0.05$ ) (Fig. 5B).

Table 1. Effects of CO<sub>2</sub> on whole blood oxygen parameters from sablefish, *Anoplopoma fimbria*

| CO <sub>2</sub> (%)                | 0.5%                   | 1.0%                   | 2.0%                    | 4.0%                   |
|------------------------------------|------------------------|------------------------|-------------------------|------------------------|
| P <sub>CO<sub>2</sub></sub> (mmHg) | 3.8                    | 7.6                    | 15.2                    | 30.4                   |
| pH <sub>e</sub>                    | 7.69±0.03 <sup>a</sup> | 7.33±0.02 <sup>b</sup> | 7.16±0.022 <sup>c</sup> | 6.96±0.01 <sup>d</sup> |
| P <sub>50</sub> (mmHg)             | 29.3±0.7 <sup>a</sup>  | 30.7±0.4 <sup>a</sup>  | 51.8±1.1 <sup>b</sup>   | 78.1±1.3 <sup>c</sup>  |
| n <sub>H</sub>                     | 1.40±0.03 <sup>a</sup> | 1.17±0.02 <sup>b</sup> | 0.97±0.020 <sup>c</sup> | 1.09±0.02 <sup>d</sup> |
| Bohr coefficient                   | 0.06±0.01 <sup>a</sup> | 1.32±0.03 <sup>b</sup> | 0.91±0.01 <sup>c</sup>  |                        |

Data are means ± s.e.m. Calculations:  $n_H = [\Delta \log(S/(1-S))]/(\Delta \log P_{O_2})$ , Bohr coefficient ( $\Delta \log P_{50}/\Delta pH_e$ ); where n<sub>H</sub> is the Hill coefficient, S is the fractional Hb saturation with O<sub>2</sub>, pH<sub>e</sub> is extracellular pH and P<sub>50</sub> is the half-saturation O<sub>2</sub> tension.

Different superscript letters indicate significant differences within a parameter.

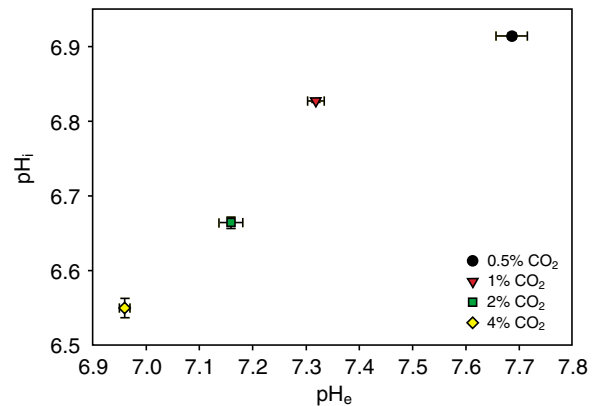

Fig. 3. The relationship between intracellular pH (pH<sub>i</sub>) and extracellular pH (pH<sub>e</sub>) in rinsed and resuspended sablefish RBCs (Hct 25%). Changes in pH were induced via incubation at 0.5, 1, 2 and 4% CO<sub>2</sub> tensions, balanced with air (21% O<sub>2</sub>). pH<sub>i</sub>=3.034+pH<sub>e</sub>×0.5089, R<sup>2</sup>=0.9179.

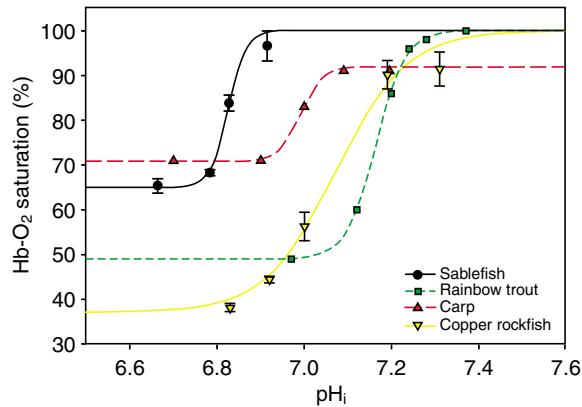

Fig. 4. The relationship between Hb-O<sub>2</sub> saturation and pH<sub>i</sub> for sablefish whole blood (black solid line) compared with data from other studies on rainbow trout (*Oncorhynchus mykiss*, green dashed line) (Nikinmaa, 1990), carp (*Cyprinus carpio*, red dashed line) (Nikinmaa, 1990) and copper rockfish (yellow solid line, present study). Curves were fitted to data using the Dynamic Fit Wizard function in SigmaPlot (see Materials and methods).

### Series 3: characterization of the RBC RVI response

Sablefish RBCs, incubated under mildly hypoxic conditions (50% air, 0.5% CO<sub>2</sub>, balance N<sub>2</sub>) and treated with a hypersaline solution shrank significantly ( $P < 0.001$ ), by at least 15% when compared with RBCs treated with Cortland's saline alone. This trend was observed as a decrease in absolute Hct values (Fig. 6A, top panel), but also as changes in Hct relative to control samples only exposed to Cortland's saline (Fig. 6A, bottom panel). Cell shrinkage persisted (by as much as 15%) when hypersaline-treated cells were also treated with the amiloride analogue EIPA ( $P < 0.001$ ) (Fig. 6A). The same trend persisted when RBCs were incubated under anoxic conditions (0% air, 0.5% CO<sub>2</sub>, balance N<sub>2</sub>) under hypersaline conditions ( $P < 0.05$ ) and in hypersaline conditions with EIPA ( $P < 0.05$ ) (Fig. 6B). However, the hypersaline+EIPA-treated RBCs had shrunk significantly more than RBCs under any other treatment at the 60 min sampling interval ( $P < 0.05$ ).

## DISCUSSION

Sablefish blood exhibits a moderate Root effect, which is likely in place to facilitate O<sub>2</sub> delivery to the highly defined choroid rete we observed at the eye (Fig. 1), as sablefish lack the other anatomical feature most commonly associated with this mechanism, the SB (Davis, 2002; Furnell, 1987). Interestingly, however, the onset of the Root effect occurs at a much lower RBC pH than in other teleosts such as the copper rockfish, determined from this study, as well as rainbow trout and carp (Nikinmaa, 1990) (Fig. 4). Such low pH values have been measured in the rete mirabile at the SB in eel (Forster and Steen, 1969; Steen, 1970) and perhaps the choroid rete of the eye, but are not thought to occur in general circulation. This may be associated with the lack of a functional RBC  $\beta$ NHE that, in many teleosts, protects RBC pH, and thus O<sub>2</sub> transport, during a generalized acidosis. We were unable to pharmacologically stimulate the RBC  $\beta$ NHE in sablefish. Furthermore, osmotically shrinking RBCs, which is known to stimulate the  $\beta$ NHE in other teleosts such as rainbow trout, brown trout (*Salmo trutta*), carp, winter flounder (*Pseudopleuronectes americanus*) and European flounder (*Platichthys flesus*) (Brauner et al., 2002; Cala, 1977; Orlov and Skryabin, 1993; Orlov et al., 1994; Weaver et al., 1999), did

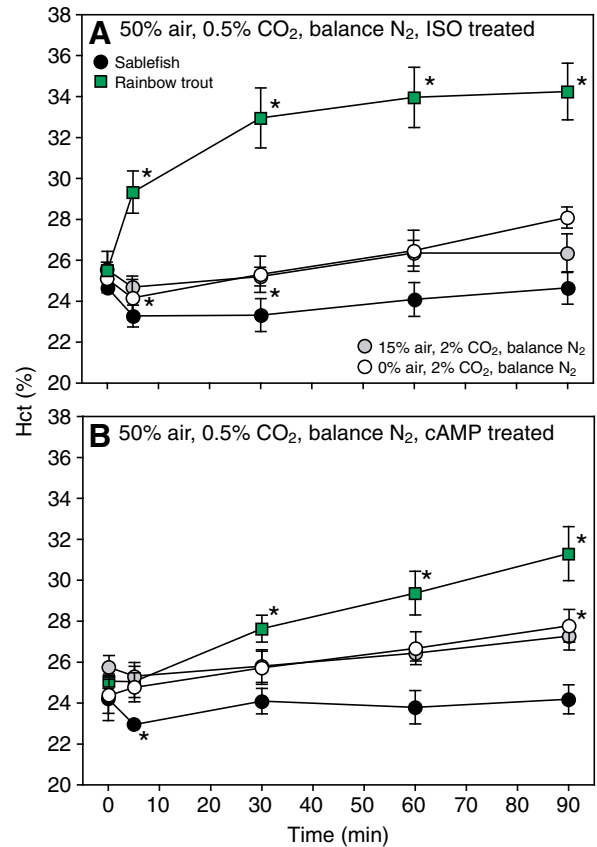

Fig. 5. Changes in Hct over time for rinsed and resuspended sablefish RBCs incubated under mildly hypoxic conditions (50% air, 0.5% CO<sub>2</sub>), moderately hypoxic and hypercapnic conditions (15% air, 2% CO<sub>2</sub>), and anoxic and hypercapnic conditions (0% air, 2% CO<sub>2</sub>) and rainbow trout RBCs incubated under mildly hypoxic conditions, upon treatment with isoproterenol (ISO, A) or 8-bromo cyclic AMP (cAMP, B). Baseline Hct is displayed at time zero, and all sampling periods following time zero represent exposure to ISO or cAMP. Asterisks indicate statistically significant changes from the Hct at time zero.

not result in a significant RVI. Because the Root effect onset occurs at such a low RBC pH, the  $\beta$ NHE may not be necessary to protect O<sub>2</sub> transport during a generalized acidosis *in vivo*, because a pH fall of that magnitude *in vivo* would be unlikely. Sablefish may represent a fifth group of teleosts exhibiting a secondary reduction or loss of a functional  $\beta$ NHE.

### Root effect magnitude and pH onset

Interestingly, the magnitude of the Root effect in sablefish resembles neither that of a species from the same taxonomic order like the copper rockfish, *S. caurinus* (order Scorpaeniformes), nor that of rainbow trout, the teleost for which the most general information on Hb-O<sub>2</sub> relationships has been collected, but rather that of the notably hypoxia tolerant common carp, *C. carpio* (Nikinmaa, 1990; Salama and Nikinmaa, 1988) (Fig. 4). Indeed, sablefish have been observed exploiting the OMZ off the coast of California, an area known to only contain species with clear hypoxia tolerance strategies (Levin, 2003). Although sablefish possess a moderate, perhaps pronounced Root effect and a relatively high P<sub>50</sub> (low-affinity Hb), hypoxia-tolerant species (e.g. carp, catfishes, loaches and some air-

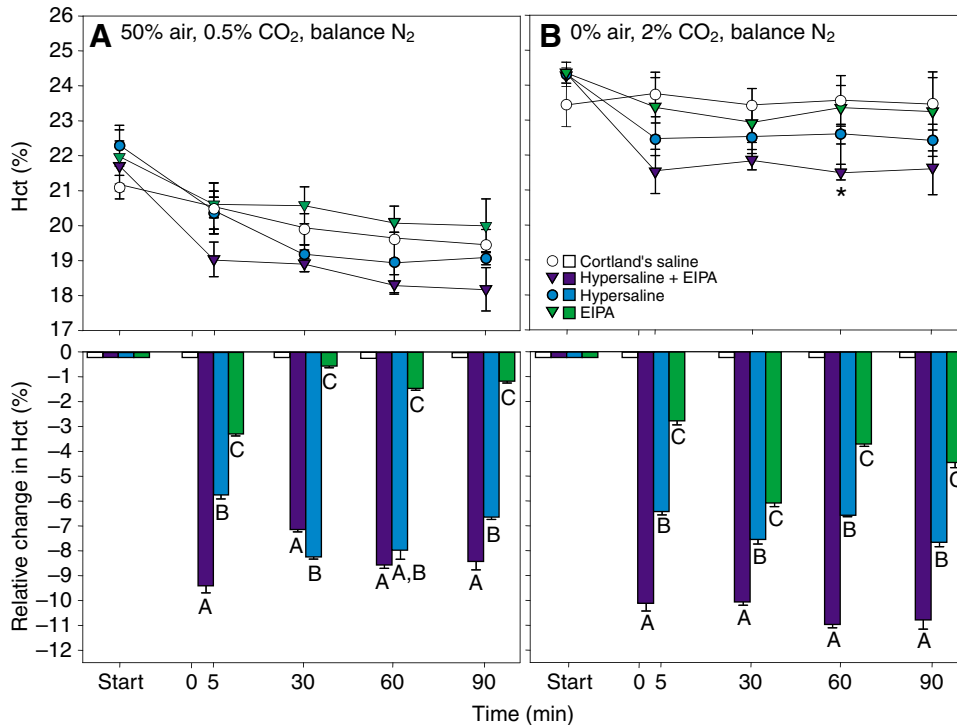

Fig. 6. Top panels represent absolute changes and bottom panels represent relative (compared with control, 0% change) changes in Hct with respect to time for sablefish RBCs rinsed and resuspended, and incubated under two conditions. Panel A (top and bottom) depicts changes in blood incubated under mildly hypoxic conditions (50% air, 0.5% CO<sub>2</sub>), and panel B (top and bottom) depicts changes in blood incubated under anoxic and hypercapnic conditions (0% air, 2% CO<sub>2</sub>). Treatments included a hypersaline solution with the amiloride analogue EIPA, hypersaline solution alone, EIPA alone or, as a control, Cortland's saline. Baseline Hct is displayed at time zero, and all sampling periods following time zero represent exposure to one of the four treatments. Asterisk indicates statistically significant changes from the Hct at time zero in the top panels; different letters represent statistically significant differences between treatments within each sampling interval in the bottom panels.

breathing fishes) are often relatively inactive and generally possess a reduced Root effect and high-affinity Hb, favouring O<sub>2</sub> loading in hypoxic environments (Berenbrink et al., 2005; Pelster and Weber, 1990; Wells et al., 1986). The sablefish's low-affinity Hb may be advantageous to tissue oxygenation in this highly predatory, powerful swimmer, but perhaps at a cost to O<sub>2</sub> uptake if sablefish are also exploiting hypoxic waters (Conway, 1967; Ryer, 2004; Sullivan and Somero, 1983). Sablefish in the wild reside at great depth and pressure, but animals used in this study had been reared at atmospheric pressure. It is well known that extreme pressure, like that associated with deepwater habitats, can affect protein stability, membrane integrity and ion transport, which could most definitely affect Hb conformation and affinity for O<sub>2</sub>. This low Hb affinity, low pH onset paradox may be resolved by incorporating the pressures associated with habitat depth into our protocols, but such experiments were beyond the scope of this study. Sablefish can be reared very successfully in well-oxygenated water at atmospheric pressure, and the Hb function is seemingly unaffected. However, our findings suggest that many more research questions remain, revolving around how environmental conditions realistic to sablefish's natural habitat may be influencing their physiology.

The pH onset for the Root effect in sablefish, or the pH<sub>i</sub> at which Hb-O<sub>2</sub> saturation falls below 100% (~6.9), is below that which would ever occur during a general acidosis in other teleosts (Nikinmaa, 1990) (Fig. 4). For example, in trout, plasma pH can fall to 7.7 and even, during the most extreme circumstances, down to 7.3, which would translate to an intracellular acidosis ranging from 7.3 to as low as 7.1 (Milligan and Wood, 1986), still higher than that required to elicit the Root effect in sablefish RBCs in this study. If the *in vivo* relationship between pH<sub>e</sub> and pH<sub>i</sub> in sablefish is similar to that of rainbow trout and other teleosts, it is unlikely that a generalized blood acidosis would ever elicit the Root effect in the general circulation. However, in this study, pH<sub>i</sub> at 0.5% CO<sub>2</sub> in rinsed, resuspended sablefish RBCs was low (6.9) relative to values commonly observed in trout (7.4) (Heming et

al., 1987). No other such data exist for this species; however, if pH<sub>i</sub> is unusually low in sablefish, perhaps O<sub>2</sub> transport could be compromised during a severe acidosis in the absence of βNHE. Clearly, further *in vivo* studies are required to address this point. Regan and Brauner (Regan and Brauner, 2010) found that although the most phylogenetically basal fish species in the transition zone of Root effect evolution (specifically bowfin *Amia calva*, mooneye *Hiodon tergisus* and pirarucu *Arapaima gigas*) possess a moderate to pronounced Root effect, they also have very low pH onset values for the Root effect (ranging from 6.8 to 7.0) as observed in sablefish. All of these species also lack a functional RBC βNHE, but unlike the sablefish, these basal species appeared before the evolution of RBC βNHE.

#### RBC pH regulation

Derived teleosts have evolved adrenergically sensitive RBC βNHEs that, when activated during an acidosis, serve to elevate RBC pH and secure O<sub>2</sub> uptake at the gills, despite the presence of a Root effect, perhaps at a time when the stressed organism needs O<sub>2</sub> the most. The βNHE(1), unique to teleosts, remains one of the most well-characterized non-mammalian β-adrenergic-activated mechanisms (Motais et al., 1992; Nikinmaa, 1992) and is thought to have evolved as a paralogue to the adrenergic-insensitive, cAMP-insensitive NHE1 found in other vertebrates (Nickerson et al., 2003). Our findings suggest no adrenergic control over NHE in sablefish RBCs. The concentrations of the adrenergic agonist used in this study have been found to elicit the maximum (saturated) response in rainbow trout blood *in vitro* (Tetens et al., 1988), but it is also well known that the density and affinity of trout RBC β-adrenergic receptors can be dramatically affected by chronic stress, for example social status or confinement (Thomas and Gilmour, 2006), as well as season and temperature (Koldkjær et al., 2004; Lecklin et al., 2000). However, we addressed this, in part, by also attempting to activate the βNHE downstream from the adrenergic receptor on the RBC membrane with cAMP (Mahe

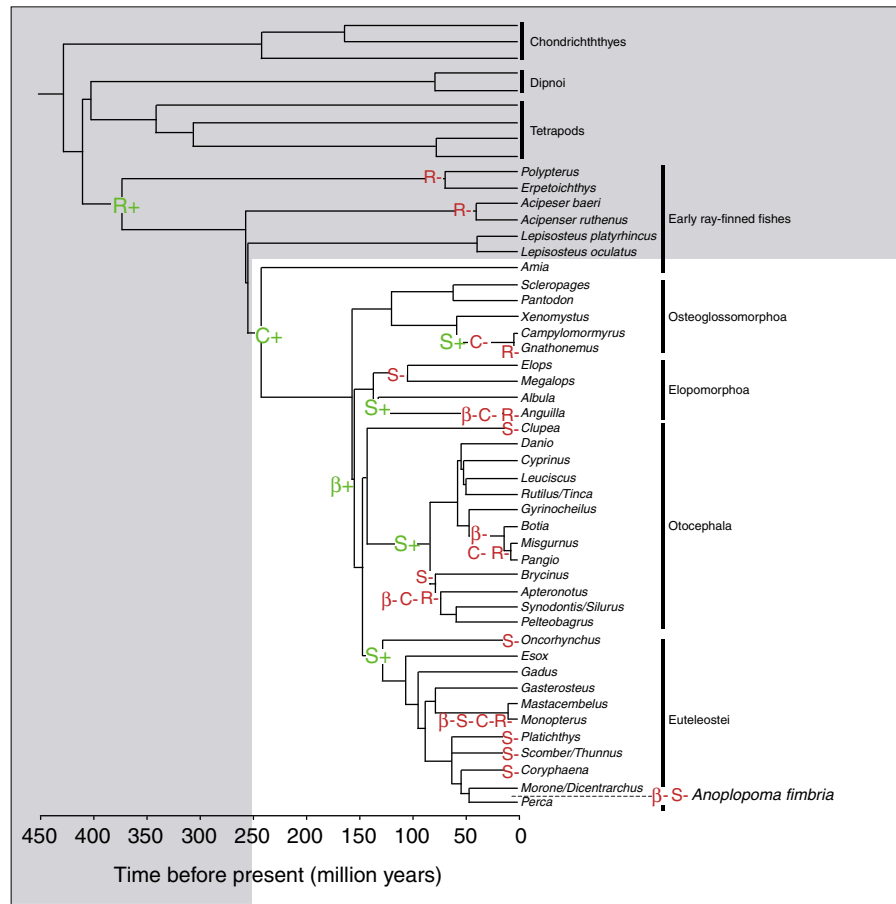

Fig. 7. Phylogenetic tree (modified from Berenbrink et al., 2005) depicting the relationships between species with respect to the first appearances and various losses of characteristics associated with the Root effect. Clades are grouped as per Berenbrink et al. (Berenbrink et al., 2005). Branch lengths are minimal divergence times as estimated from the fossil record. Terminal branches bearing two names denote studies where data from both species were used (Berenbrink et al., 2005). Bold letters demarcate the first appearance(s) (+) and each secondary loss (-) or reduction in a trait, such as the Root effect (R), where a loss would be a reduction in magnitude to <40% (in stripped haemolysates with saturating levels of organic phosphates), choroid rete (C), adrenergically activated  $\beta$ NHE on the RBC ( $\beta$ ), and the rete mirabile at the swim bladder (S). The white inset represents all species that evolved subsequent to the first and only known appearance of the most ancient anatomical structure associated with the Root effect, the choroid rete, approximately 250 mya. Sablefish are placed as close to the Perciformes (*Perca*) lineage as possible, to stay in line with the original phylogenetic relationships (Nelson, 1994) accessed for this evolutionary reconstruction (Berenbrink et al., 2005). Although results from this study on washed and resuspended RBCs suggest the reduction in Hb-O<sub>2</sub> saturation is slightly <40%, which would categorize sablefish with a reduced Root effect (ancestral state) according to Berenbrink et al. (Berenbrink et al., 2005), a preliminary study where the magnitude of the Root effect was assessed in sablefish haemolysates with saturating organophosphate levels according to Berenbrink et al. (Berenbrink et al., 2005), and thus a procedure consistent with that used for other species presented in this figure, resulted in a Root effect magnitude >40%.

et al., 1985), as the  $\beta$ NHE is the only known form of the NHE to be activated by a cAMP/protein kinase A (PKA) pathway (Borgese et al., 1992). Although we did not find any evidence for a functional RBC  $\beta$ NHE in this study, it would be interesting to look at mRNA expression of RBC  $\beta$ 3 adrenoreceptors and  $\beta$ NHEs to gain insight into the level at which function is lost. For example, the eel, which represents another teleost group where the function of the RBC  $\beta$ NHE has been secondarily lost, does possess RBC  $\beta$ -adrenoreceptors (Perry and Reid, 1992). Despite the lack of functional RBC  $\beta$ NHE, sablefish may be unlikely to experience reduced O<sub>2</sub> uptake at the gills even during the most severe acidosis, because the onset pH for the Root effect is so low. It may be that the only location in sablefish where the Root effect may be elicited *in vivo* is where an acidosis could be localized and perpetuated, like the dense counter-current capillary network of the choroid rete.

### Cell volume regulation

The process of regulating and restoring RBC volume has been well characterized in most vertebrates, including mammals, amphibians, teleosts and agnathans (reviewed in Cossins and Gibson, 1997). Specifically, NHEs are ubiquitous in organisms across all phyla from all kingdoms (reviewed in Brett et al., 2005), and the NHE1 isoform is important for regulation of pH<sub>i</sub> and cell volume in nearly all eukaryotic cells (Wakabayashi, 1997; Yun et al., 1995). It appears that an adrenergic-insensitive sablefish RBC NHE may be activated in both mild hypoxia and anoxia incubation conditions, because RBCs treated with the amiloride analogue EIPA (which is specific to NHE) exhibit shrinkage prior to exposure to hypersaline conditions (Fig. 6). Furthermore, RBCs subjected to hypersaline conditions exhibit a greater degree of shrinkage in the presence of EIPA, indicating that, again, a transporter is being activated to regulate cell volume, although not very effectively as recovery in

the hypersaline-treated RBCs was not evident over the 90 min time course of the experiment (Fig. 6). Although it would have been interesting to prolong the exposure to see whether volume recovery was possible, we observed problems with haemolysis. This observation suggests that prolonged RBC shrinkage may have compromised membrane integrity resulting in atypically fragile cells, a phenomenon that has also been observed in lungfish (Koldkjær et al., 2002). Regardless, it does appear that an NHE isoform may be operating on the sablefish RBC membrane to maintain pH and cell volume homeostasis, likely a 'housekeeping' NHE1 (Claiborne et al., 1999; Deigweier et al., 2008); however, further studies are required to address this.

#### Role of the Root effect

The phylogenetic reconstruction executed by Berenbrink and colleagues (Berenbrink et al., 2005) revealed that the ancestral state of Root effect evolution corresponded with a Root effect magnitude of <40% reduction in maximal Hb-O<sub>2</sub> saturation upon acidification. For their reconstruction, however, Hb solutions (haemolysates) were prepared in citrate buffers to stabilize native organophosphate modulators and ensure maximal expression of the Root effect (Berenbrink et al., 2005). Washed and resuspended sablefish RBCs for our study exhibited a maximal desaturation of ~35%; however, in a preliminary (but *post-hoc*) investigation on sablefish haemolysates prepared and analysed according to Berenbrink et al. (Berenbrink et al., 2005), the magnitude of the Root effect exceeded 40%. If included in the Berenbrink phylogeny (Fig. 7), sablefish would likely be categorized as possessing a pronounced rather than reduced Root effect, but until a thorough study addressing Hb modulators can supplement the current study, we refer to the Root effect magnitude in sablefish as 'moderate'.

To date, the primary roles for the Root effect in teleosts are thought to be (1) oxygenating the retina and (2) filling the SB, but the possession of Root shift Hbs does not necessarily correlate with the presence of retina. The SB rete mirabile evolved independently at least four times in derived teleosts approximately 130 mya, and the structure has since been secondarily lost several times (Berenbrink et al., 2005) (Fig. 7). In contrast, the choroid rete at the eye evolved only once, approximately 250 mya in the common ancestor of *Amia* and teleosts, but has also been lost at least five times over the course of teleost evolution (Berenbrink et al., 2005) (Fig. 7). Basal actinopterygian species like the bowfin, mooneye and pirarucu (Regan and Brauner, 2010) and some of the Hb-possessing Antarctic Nototheniid species (Verde et al., 2008) possess moderate Root effects and only a choroid rete at the eye. A decrease in the Root effect magnitude (<40%) has only been noted in species where the choroid rete has also been lost, like the catfishes, loaches and some eels [*Gnathonemus*+*Campylomormyrus*, *Anguilla* and *Misgurnus* clades (see Berenbrink et al., 2005)]. As long as the choroid rete is present, loss of the rete mirabile at the SB should have no impact on the magnitude of the Root effect (Berenbrink et al., 2005). Therefore it is not surprising that the deep-dwelling sablefish, which possesses a choroid rete but lacks a SB, exhibits a moderate Root effect. In fact, relative to body and eye size, the sablefish choroid rete is larger than what is observed in rainbow trout (Herbert and Wells, 2002) or other rockfish species (J.L.R., personal observation), which is likely correlated to the role of the choroid rete in retinal oxygenation (M. Berenbrink, personal communication) (Fig. 1). Fish species residing in water shallower than the aphotic bathypelagic zone but as deep as the mesopelagic

zone (150–1000 m) experience progressively dimmer light conditions, and the highly developed vision on which they may come to rely could be coordinated with enhanced retinal oxygenation. Deepwater predatory species like sablefish (as deep as 2740 m) (McFarlane and Beamish, 1983a; McFarlane and Beamish, 1983b) may therefore be at an advantage if they are able to hone visual acuity.

Ever since the first appearance of the RBC  $\beta$ NHE in teleosts, there have been at least four, this instance being the fifth, secondary losses of RBC  $\beta$ NHE activity (Fig. 7). The four groups previously identified (Berenbrink et al., 2005), which include the eels, catfishes and loaches, however, have also exhibited a decrease in the magnitude of the Root effect (<40% desaturation) and lost the choroid rete at the eye (Berenbrink et al., 2005). Sablefish maintain the choroid at the eye and possess a moderate Root effect, which in the presence of saturating levels of organophosphates may be greater than 40%. This system is in place without the adrenergically stimulated protective mechanism at the RBC, the  $\beta$ NHE. We suspect that the absence of the  $\beta$ NHE is associated with the decrease in the Root effect onset pH, suggesting that the only place where pH would reach such low levels as to induce the Root effect would be in an isolated system like the choroid rete at the eye, rather than in the general circulation. However, the sablefish O<sub>2</sub> transport system may be very plastic, potentially dependent on life history stage, environmental conditions, and controlled by Hb modulators. While an intriguing species to study from a purely scientific, perhaps even an evolutionary perspective, many questions remain to be answered before we can fully understand the interesting respiratory and stress physiology of the sablefish.

#### LIST OF ABBREVIATIONS

|                 |                                                                                                 |
|-----------------|-------------------------------------------------------------------------------------------------|
| $\beta$ NHE     | $\beta$ -adrenergically stimulated sodium (Na <sup>+</sup> ) proton (H <sup>+</sup> ) exchanger |
| $\Phi$          | Bohr coefficient                                                                                |
| cAMP            | 8-bromo cyclic adenosine monophosphate                                                          |
| EIPA            | 5-( <i>N</i> -ethyl- <i>N</i> -isopropyl)amiloride                                              |
| Hb              | haemoglobin                                                                                     |
| Hct             | haematocrit                                                                                     |
| ISO             | isoproterenol                                                                                   |
| MCHC            | mean cellular haemoglobin concentration                                                         |
| mya             | million years ago                                                                               |
| $n_H$           | Hill cooperativity coefficient                                                                  |
| OEC             | oxygen equilibrium curve                                                                        |
| OMZ             | oxygen minimum zone                                                                             |
| $P_{50}$        | $P_{O_2}$ at 50% saturation                                                                     |
| pH <sub>e</sub> | extracellular pH                                                                                |
| pH <sub>i</sub> | intracellular pH                                                                                |
| PKA             | protein kinase A                                                                                |
| $P_{O_2}$       | oxygen tension                                                                                  |
| PROP            | propranolol                                                                                     |
| RBC             | red blood cell                                                                                  |
| RVI             | regulatory volume increase                                                                      |
| S               | fractional saturation                                                                           |
| SB              | swim bladder                                                                                    |

#### ACKNOWLEDGEMENTS

This study was supported by a Discovery grant from the Natural Sciences and Engineering Research Council (NSERC) of Canada to C.J.B. Funding for J.L.R. was through the University of British Columbia Graduate Fellowship program and for M.R.-M. through an NSERC undergraduate research scholarship. The authors wish to thank D. W. Baker, S. K. Hanna and F. Zahedieh for technical assistance, the staff and scientific support at Bamfield Marine Science Centre, including Drs B. Cameron and G. Goss, as well as Drs T. D. Clark and D. J. Randall for interesting discussions and editorial comments, and finally, two anonymous reviewers whose contributions have resulted in dramatic improvements to this study and manuscript.



## REFERENCES

- Alexander, R. M. (1966). Physical aspects of swimbladder function. *Biol. Rev.* **41**, 141-176.
- Berenbrink, M. and Bridges, C. (1994). Catecholamine-activated sodium/proton exchange in the red blood cells of the marine teleost *Gadus morhua*. *J. Exp. Biol.* **192**, 253-267.
- Berenbrink, M., Koldkjær, P., Kepp, O. and Cossins, A. R. (2005). Evolution of oxygen secretion in fishes and the emergence of a complex physiological system. *Science* **307**, 1752-1757.
- Borgese, F., Garcia-Romeu, F. and Motais, R. (1987). Control of cell volume and ion transport by beta-adrenergic catecholamines in erythrocytes of rainbow trout, *Salmo gairdneri*. *J. Physiol.* **382**, 123-144.
- Borgese, F., Sardet, C., Cappadoro, M., Poussegur, J. and Motais, R. (1992). Cloning and expression of a cAMP-activated  $\text{Na}^+/\text{H}^+$  exchanger: Evidence that the cytoplasmic domain mediates hormonal regulation. *Proc. Natl. Acad. Sci. USA* **89**, 6765-6769.
- Brauner, C. J., Wang, T. and Jensen, F. B. (2002). Influence of hyperosmotic shrinkage and  $\beta$ -adrenergic stimulation on red blood cell volume regulation and oxygen binding properties in rainbow trout and carp. *J. Comp. Physiol. B* **172**, 251-262.
- Brett, C. L., Donowitz, M. and Rao, R. (2005). Evolutionary origins of eukaryotic sodium/proton exchangers. *Am. J. Physiol. Cell Physiol.* **288**, 233-239.
- Brittain, T. (1987). The Root effect. *Comp. Biochem. Physiol. B Biochem. Mol. Biol.* **86**, 473-481.
- Cala, P. (1977). Volume regulation by flounder red blood cells in anisotonic media. *J. Gen. Physiol.* **69**, 537-552.
- Caldwell, S., Rummer, J. L. and Brauner, C. J. (2006). Blood sampling techniques and storage duration: effects on the presence and magnitude of the red blood cell  $\beta$ -adrenergic response in rainbow trout (*Oncorhynchus mykiss*). *Comp. Biochem. Physiol. A Mol. Integr. Physiol.* **144**, 188-195.
- Claiborne, J., Blackston, C., Choe, K., Dawson, D., Harris, S., Mackenzie, L. and Morrison-Shettler, A. (1999). A mechanism for branchial acid excretion in marine fish: identification of multiple  $\text{Na}^+/\text{H}^+$  antiporter (NHE) isoforms in gills of two seawater teleosts. *J. Exp. Biol.* **202**, 315-324.
- Conway, J. B. (1967). Food relationships and general population biology of the sablefish, *Anoplopoma fimbria* and the Pacific hake, *Merluccius productus*. PhD thesis, San Diego State University.
- Cossins, A. R. and Gibson, J. S. (1997). Volume-sensitive transport systems and cell volume homeostasis in vertebrate red blood cells. *J. Exp. Biol.* **200**, 343-352.
- Cossins, A. R. and Kilbey, R. V. (1991). Adrenergic responses and the Root effect in erythrocytes of freshwater fish. *J. Fish Biol.* **38**, 421-429.
- Davis, M. W. (2002). Key principles for understanding fish bycatch discard mortality. *Can. J. Fish. Aquat. Sci.* **59**, 1834-1843.
- Davis, M. W. (2005). Behaviour impairment in captured and released sablefish: ecological consequences and possible substitute measures for delayed discard mortality. *J. Fish Biol.* **66**, 254-265.
- Davis, M. W. and Parker, S. J. (2004). Fish size and exposure to air: Potential effects on behavioral impairment and mortality rates in discarded sablefish. *N. Am. J. Fish. Manage.* **24**, 518-524.
- Deigweher, K., Koschnick, N., Portner, H.-O. and Lucassen, M. (2008). Acclimation of ion regulatory capacities in gills of marine fish under environmental hypercapnia. *Am. J. Physiol. Regul. Integr. Comp. Physiol.* **295**, R1660-R1670.
- Fievet, B. and Motais, R. (1991).  $\text{Na}^+/\text{H}^+$  exchanges and red blood cell functions in fish. In *Advances in Comparative and Environmental Physiology*, vol. 8 (ed. R. Gilles), pp. 79-104. Berlin: Springer-Verlag.
- Forster, R. E. and Steen, J. B. (1969). The rate of the 'Root' effect in eel red cells and eel haemoglobin solutions. *J. Physiol.* **204**, 259-282.
- Fuchs, D. A. and Albers, C. (1988). Effect of adrenaline and blood gas conditions on red cell volume and intra-erythrocytic electrolytes in the carp, *Cyprinus carpio*. *J. Exp. Biol.* **137**, 457-477.
- Furnell, D. J. (1987). Partitioning of locomotor and feeding metabolism in sablefish (*Anoplopoma fimbria*). *Can. J. Zool.* **65**, 486-489.
- Guizouarn, H., Harvey, B., Borgese, F., Gabillat, N., Garcia-Romeu, F. and Motais, R. (1993). Volume-activated  $\text{Cl}^-$  independent and  $\text{Cl}^-$  dependent  $\text{K}^+$  pathways in trout red blood cells. *J. Physiol.* **462**, 609-626.
- Heming, T. A., Randall, D. J. and Mazeaud, M. M. (1987). Effects of adrenaline on ionic equilibria in red blood cells of rainbow trout (*Salmo gairdneri*). *Fish Physiol. Biochem.* **3**, 83-90.
- Herbert, N. and Wells, R. (2002). The effect of strenuous exercise and beta-adrenergic blockade on the visual performance of juvenile rainbow trout, *Oncorhynchus mykiss*. *J. Comp. Physiol. B* **172**, 725-731.
- Ingermann, R. L. (1982). Physiological significance of Root effect hemoglobins in trout. *Respir. Physiol.* **49**, 1-10.
- Jensen, F. B. (2004). Red blood cell pH, the Bohr effect, and other oxygenation-linked phenomena in blood  $\text{O}_2$  and  $\text{CO}_2$  transport. *Acta Physiol. Scand.* **182**, 215-227.
- Koldkjær, P., Taylor, E. W., Glass, M. L., Wang, T., McKenzie, D. J. and Jensen, F. B. (2002). Adrenergic receptors,  $\text{Na}^+/\text{H}^+$  exchange and volume regulation in lungfish erythrocytes. *J. Comp. Physiol. B* **172**, 87-93.
- Koldkjær, P., Pottinger, T. G., Perry, S. F. and Cossins, A. R. (2004). Seasonality of the red blood cell stress response in rainbow trout (*Oncorhynchus mykiss*). *J. Exp. Biol.* **207**, 357-367.
- Kristensen, K., Koldkjær, P., Berenbrink, M. and Wang, T. (2007). Oxygen sensitive regulatory volume increase in red blood cells from cane toad, *Bufo marinus*. *Comp. Biochem. Physiol. A Mol. Integr. Physiol.* **146**, S163.
- Kristensen, K., Berenbrink, M., Koldkjær, P., Abe, A. and Wang, T. (2008). Minimal volume regulation after shrinkage of red blood cells from five species of reptiles. *Comp. Biochem. Physiol. A Mol. Integr. Physiol.* **150**, 46-51.
- Lecklin, T., Tuominen, A. and Nikinmaa, M. (2000). The adrenergic volume changes of immature and mature rainbow trout (*Oncorhynchus mykiss*) erythrocytes. *J. Exp. Biol.* **203**, 3025-3031.
- Levin, L. A. (2003). Oxygen minimum zone benthos: adaptation and community responses to hypoxia. In *Oceanography and Marine Biology: An Annual Review* (ed. R. N. Gibson and R. J. Atkinson), pp. 1-45. London: Taylor and Francis.
- Lupes, S. C., Davis, M. W., Olla, B. L. and Schreck, C. B. (2006). Capture-related stressors impair immune system function in sablefish. *Trans. Am. Fish. Soc.* **135**, 129-138.
- Mahe, Y., Garcia-Romeu, F. and Motais, R. (1985). Inhibition by amiloride of both adenylate cyclase activity and the  $\text{Na}^+/\text{H}^+$  antiporter in fish erythrocytes. *Eur. J. Pharm.* **116**, 199-206.
- McFarlane, G. A. and Beamish, R. J. (1983a). Biology of adult sablefish (*Anoplopoma fimbria*) in waters off western Canada. In *Proceedings of the International Sablefish Symposium 1983, 83-8*, pp. 59-80. Anchorage: Alaska Sea Grant.
- McFarlane, G. A. and Beamish, R. J. (1983b). Preliminary observations on the juvenile biology of sablefish (*Anoplopoma fimbria*) in waters off the coast of Canada. In *Proceedings of the International Sablefish Symposium 1983, 83-8*, pp. 119-135. Anchorage: Alaska Sea Grant.
- Milligan, C. and Wood, C. (1986). Intracellular and extracellular acid-base status and  $\text{H}^+$  exchange with the environment after exhaustive exercise in the rainbow trout. *J. Exp. Biol.* **123**, 93-121.
- Milligan, C. and Wood, C. (1987). Regulation of blood oxygen transport and red cell pH after exhaustive activity in rainbow trout (*Salmo gairdneri*) and starry flounder (*Platichthys stellatus*). *J. Exp. Biol.* **133**, 263-282.
- Moser, G., Chakter, R. L., Smith, P. E., Lo, N. C. H., Ambrose, D. A., Meyer, C. A., Sandknop, E. M. and Watson, W. (1994). Early life history of sablefish, *Anoplopoma fimbria*, off Washington, Oregon, and California, with application to biomass estimation. *CalCOFI Rep.* **35**, 144-159.
- Motais, R., Fievet, B., Garcia-Romeu, F. and Thomas, S. (1989).  $\text{Na}^+/\text{H}^+$  exchange and pH regulation in red blood cells: Role of uncatalyzed  $\text{H}_2\text{CO}_3$  dehydration. *Am. J. Physiol.* **256**, C728-C735.
- Motais, R., Borgese, F., Fievet, B. and Garcia-Romeu, F. (1992). Regulation of  $\text{Na}^+/\text{H}^+$  exchange and pH in erythrocytes of fish. *Comp. Biochem. Physiol. A Mol. Integr. Physiol.* **102**, 597-602.
- Nelson, J. S. (1994). *Fishes of the World*, 3rd edn. New York: Wiley.
- Nickerson, J. G., Dugan, S. G., Drouin, G., Perry, S. F. and Moon, T. W. (2003). Activity of the unique  $\beta$ -adrenergic  $\text{Na}^+/\text{H}^+$  exchanger in trout erythrocytes is controlled by a novel  $\beta$ -AR subtype. *Am. J. Physiol. Regul. Integr. Comp. Physiol.* **285**, R526-R535.
- Nikinmaa, M. (1990). *Vertebrate Red Cells: Adaptations of Function to Respiratory Requirements*. Berlin: Springer Verlag.
- Nikinmaa, M. (1992). Membrane transport and control of hemoglobin-oxygen affinity in nucleated erythrocytes. *Physiol. Rev.* **72**, 301-321.
- Nikinmaa, M., Cech, J. J. and McEnroe, M. (1984). Blood oxygen transport in stressed striped bass (*Morone saxatilis*): Role of  $\beta$ -adrenergic responses. *J. Comp. Physiol.* **154**, 365-369.
- Nikinmaa, M., Tiitonen, K. and Paajaste, M. (1990). Adrenergic control of red cell pH in salmonid fish: roles of the sodium/proton exchange, Jacobs-Stewart cycle and membrane potential. *J. Exp. Biol.* **154**, 257-271.
- Orlov, S. N. and Skryabin, G. A. (1993). Catecholamine-dependent and volume-dependent ion fluxes in carp (*Cyprinus carpio*) red blood cells. *J. Comp. Physiol. B* **163**, 413-420.
- Orlov, S. N., Cragoe, E. J. and Hanninen, O. (1994). Volume-dependent and catecholamine-dependent regulation of  $\text{Na}^+/\text{H}^+$  antiporter and unidirectional potassium fluxes in *Salmo trutta* red blood cells. *J. Comp. Physiol.* **164**, 135-140.
- Pelster, B. and Weber, R. E. (1990). Influence of organic phosphates on the Root effect of multiple fish haemoglobins. *J. Exp. Biol.* **149**, 425-437.
- Pelster, B. and Weber, R. E. (1991). The physiology of the Root effect. In *Advances in Comparative and Environmental Physiology*, vol 8, pp. 51-77. Berlin: Springer-Verlag.
- Perry, S. F. and Reid, S. D. (1992). The relationship between  $\beta$ -adrenoceptors and adrenergic responsiveness in trout (*Oncorhynchus mykiss*) and eel (*Anguilla rostrata*) erythrocytes. *J. Exp. Biol.* **167**, 235-250.
- Perry, S. F., Reid, S. and Salama, A. (1996). The effects of repeated physical stress on the  $\beta$ -adrenergic response of the rainbow trout red blood cell. *J. Exp. Biol.* **199**, 549-562.
- Primmitt, D., Randall, D. J., Mazeaud, M. and Boutillier, R. (1986). The role of catecholamines in erythrocyte pH regulation and oxygen transport in rainbow trout (*Salmo gairdneri*) during exercise. *J. Exp. Biol.* **122**, 139-148.
- Regan, M. D. and Brauner, C. J. (2010). The evolution of Root effect hemoglobins in the absence of intracellular pH protection of the red blood cell: insights from primitive fishes. *J. Comp. Physiol. B* doi:10.1007/s00360-010-0450-5.
- Root, R. W. (1931). The respiratory function of the blood of marine fishes. *Biol. Bull.* **61**, 427-456.
- Root, R. W. and Irving, L. (1943). The effect of carbon dioxide and lactic acid on the oxygen-combining power of whole and hemolyzed blood of the marine fish *Tautoga onitis* (Linn.). *Mar. Biol. Lab.* **84**, 207-242.
- Ryer, C. H., Ottmar, M. L. and Sturm, E. A. (2004). Behavioral impairment after escape from trawl codends may not be limited to fragile fish species. *Fish. Res.* **66**, 261-269.
- Salama, A. and Nikinmaa, M. (1988). The adrenergic responses of carp (*Cyprinus carpio*) red cells: effects of  $\text{P}_{\text{O}_2}$  and pH. *J. Exp. Biol.* **136**, 405-416.
- Steen, J. B. (1970). The swimbladder as a hydrostatic organ. In *Fish Physiology*, vol. IV (ed. W. S. Hoar and D. J. Randall), pp. 413-443. New York and London: Academic Press.
- Sullivan, K. M. and Somero, G. N. (1983). Size- and diet-related variations in enzymatic activity and tissue composition in the sablefish, *Anoplopoma fimbria*. *J. Exp. Mar. Biol. Ecol.* **164**, 315-326.
- Tetens, V., Lykkeboe, G. and Christensen, N. J. (1988). Potency of adrenaline and noradrenaline for  $\beta$ -adrenergic proton extrusion from red cells of rainbow trout, *Salmo gairdneri*. *J. Exp. Biol.* **134**, 267-280.

- Thomas, J. B. and Gilmour, K. M.** (2006). The impact of social status on the erythrocyte  $\beta$ -adrenergic response in rainbow trout, *Oncorhynchus mykiss*. *Comp. Biochem. Physiol. A Mol. Integr. Physiol.* **143**, 162-172.
- Thomas, S. and Perry, S. F.** (1992). Control and consequences of adrenergic activation of red blood cell  $\text{Na}^+/\text{H}^+$  exchange on blood oxygen and carbon dioxide transport. *J. Exp. Zool.* **263**, 160-175.
- Tucker, V. A.** (1967). Method for oxygen content and dissociation curves on microliter blood samples. *J. App. Physiol.* **23**, 410-414.
- Tufts, B. L. and Randall, D. J.** (1989). The functional significance of adrenergic pH regulation in fish erythrocytes. *Can. J. Zool.* **67**, 235-238.
- Verde, C., Berenbrink, M. and di Prisco, G. D.** (2008). Evolutionary physiology of oxygen secretion in the eye of fishes of the suborder Notothenioidei. In *Dioxygen Binding and Sensing Proteins: a Tribute to Beatrice and Jonathan Wittenberg* (ed. M. Bolognesi, G. di Prisco and C. Verde), pp. 49-66. Milan: Springer.
- Wakabayashi, S., Shigekawa, M. and Pouyssegur, J.** (1997). Molecular physiology of vertebrate  $\text{Na}^+/\text{H}^+$  exchangers. *Physiol. Rev.* **77**, 51-74.
- Weaver, Y. R., Kiessling, K. and Cossins, A. R.** (1999). Responses of the  $\text{Na}^+/\text{H}^+$  exchanger of European flounder red blood cells to hypertonic,  $\beta$ -adrenergic and acidotic stimuli. *J. Exp. Biol.* **202**, 21-32.
- Wells, R., Forster, M., Davison, W., Taylor, H., Davie, P. and Satchell, G.** (1986). Blood oxygen transport in the free-swimming hagfish, *Eptatretus cirrhatu*s. *J. Exp. Biol.* **123**, 43-53.
- Wittenberg, J. B. and Wittenberg, B. A.** (1974). The choroid rete mirabile of the fish eye. I. Oxygen secretion and structure: comparison with the swimbladder rete mirabile. *Biol. Bull.* **146**, 116-136.
- Wolf, K.** (1963). Physiological salines for freshwater teleosts. *Prog. Fish. Cult.* **25**, 135-140.
- Yun, C. H., Tse, C. M., Nath, S. K., Levine, S. A., Brant, S. R. and Donowitz, M.** (1995). Mammalian  $\text{Na}^+/\text{H}^+$  exchanger gene family: structure and function studies. *Am. J. Physiol.* **269**, G1-G11.
- Zeidler, R. and Kim, D. H.** (1977). Preferential hemolysis of postnatal calf red cells induced by internal alkalization. *J. Gen. Physiol.* **70**, 385-401.
